# Supplementary material
Source: publisher figshare collection journal article supplement (https://springernature.figshare.com/ndownloader/files/22406364)
Supplement: Supplementary file 1 [file 22406364]

## Sheet: Dataset LASSO
67 patients and 53 linear variables used in analysis by LASSO.
Code to process raw data and obtain this dataset can be seen in https://github.com/caramirezal/vihCohort/blob/master/scripts/article_figures.R
Delta_CD4_year1	LeucocitosS0	HematocritoS0	PlaquetasS0	GlucosaS0	Acido_uricoS0	CreatininaS0	CD4porcentajeS0	CD8_S0	CD8porcentajeS0	CocCD4_CD8_S0	CD4_S08	CD4porcentajeS08	CD8_S08	CD8porcentajeS08	CocCD4_CD8_S08	CD4_S12	CD4porcentajeS12	CD8_S12	CD8porcentajeS12	CocCD4_CD8_S12	GlucosaS24	UreaS24	Acido_uricoS24	CreatininaS24	Bili_dirS24	TGO_S24	TGP_S24	LDH_S24	Fosf_alcS24	ColesterolS24	TrigliceridosS24	CD4_S24	CD4porcentajeS24	CD8_S24	CD8porcentajeS24	CocCD4_CD8_S24	CD4_S39	CD4porcentajeS39	CD8_S39	CD8porcentajeS39	CocCD4_CD8_S39	CD4porcentajeS52	CD8_S52	CD8porcentajeS52	CocCD4_CD8_S52	Num_eventos_6_meses	Edad	CV_S000	CV_S008
Delta_CD4_year1	W0_leucocytes	W0_HCT	W0_PLT	W0_FBglu	W0_uric_acid	W0_Cr	W0_percent_CD4	W0_CD8_count	W0_percent_CD8	W0_CD4_CD8_ratio	W08_CD4_count	W08_percent_CD4	W08_CD8_count	W08_percent_CD8	W8_CD4_CD8_ratio	W12_CD4_count	W12_percent_CD4	W12_CD8_count	W12_percent_CD8	W12_CD4_CD8_ratio	W24_FBglu	W24_Urea	W24_uric_acid	W24_Cr	W24_D_Bil	W24_AST	W24_ALT	W24_LDH	W24_ALP	W24_cholesterol	W24_TGL	W24_CD4_count	W24_percent_CD4	W24_CD8_count	W24_percent_CD8	W24_CD4_CD8_ratio	W39_CD4_count	W39_percent_CD4	W39_CD8_count	W39_percent_CD8	W39_CD4_CD8_ratio	CD4percentW52	W52_CD8_count	W52_percent_CD8	W52_CD4_CD8_ratio	Clin_events_W0toW24	Age	W0_VL	W8_VL
178	3.9	34.3	402	80	6.1	0.85	4	731	74	0.052	113	9	652	51	0.173	100	8	650	52	0.154	92	24	5.67	0.92	0.12	19	15	303	139	220	564	179	11	742	45	0.241	196	11	647	38	0.303	14	669	42	0.323	1	46.9	732000	199
204	5.6	45.6	184	103	6.4	0.87	1	1446	73	0.017	229	4	4760	83	0.048	180	4	3211	78	0.056	109	28	6.1	0.72	0.1	30	49	393	149	168	311	154	4	2904	74	0.053	225	5	2869	69	0.078	6	2512	71	0.091	0	41.3	154000	400
115	2	45.6	148	89	6.5	1.03	1	589	73	0.008	49	3	1106	68	0.044	56	4	968	67	0.058	89	13	5.1	0.69	0.01	28	25	316	174	146	219	79	4	1216	60	0.065	97	4	1462	66	0.066	7	1157	67	0.104	2	26.6	175000	400
202	2.9	39	268	77	5.98	0.84	4	578	57	0.062	91	8	598	54	0.152	80	10	353	46	0.227	86	23	5.47	0.87	0.16	25	29	420	96	179	253	104	7	704	51	0.148	175	8	842	41	0.208	13	769	41	0.309	2	31.5	218000	400
312	1.6	41.4	177	74	6.62	0.8	3	472	79	0.032	112	8	877	62	0.128	129	11	674	57	0.191	90	24	6.79	0.85	0.17	40	91	429	104	153	264	193	14	749	56	0.258	323	15	1102	51	0.293	16	1001	50	0.327	1	27.7	1000000	15600
183	3.3	45.7	278	88	6.24	0.74	1	637	69	0.005	37	5	537	74	0.069	33	3	805	75	0.041	96	22	4.21	0.67	0.01	19	28	276	204	209	220	83	5	1123	71	0.074	122	6	1501	70	0.081	7	1927	71	0.097	2	42.4	347000	400
231	2.8	42.2	158	93	4.67	0.69	9	847	72	0.13	195	13	937	61	0.208	216	16	764	75	0.283	88	20	3.46	0.6	0.09	13	11	357	118	178	219	301	16	967	52	0.311	293	18	741	46	0.395	18	839	45	0.406	1	28	328000	400
161	3	41.2	208	79	6.39	0.84	6	667	57	0.099	157	14	512	45	0.307	146	12	561	47	0.26	82	30	6.29	0.88	0.19	26	23	325	82	167	215	124	11	528	46	0.235	223	12	888	46	0.251	14	710	43	0.32	1	31.2	288000	220
177	2.6	43.4	262	78	5.52	0.91	1	346	68	0.017	43	5	528	64	0.081	48	7	458	65	0.105	99	35	5.21	1.26	0.14	36	61	336	276	232	437	91	7	868	65	0.105	176	9	1070	58	0.164	12	953	60	0.192	0	38.2	770000	50
128	3.8	40.5	143	80	7.48	0.93	10	555	66	0.153	256	15	1149	67	0.223	247	14	1191	69	0.207	90	30	4.69	0.94	0.15	27	25	326	140	177	248	251	14	1171	66	0.214	336	19	1088	60	0.309	12	1063	60	0.2	1	40.9	1000000	77
115	3.6	44.6	308	89	3.96	0.91	1	784	83	0.006	90	7	985	74	0.091	82	6	980	74	0.084	92	34	4.18	1.11	0.14	21	21	352	106	290	209	81	5	1284	73	0.063	116	7	1149	67	0.101	7	1195	71	0.1	1	35.5	132000	50
404	4	40	115	88	5.09	0.81	4	534	60	0.066	237	11	1058	50	0.224	215	13	820	48	0.262	128	30	5.32	0.86	0.1	33	35	304	149	212	211	385	15	899	36	0.428	397	16	930	37	0.427	17	939	37	0.468	2	53	1000000	351
35	5.3	40.1	237	88	6.42	1.41	7	2033	77	0.091	235	12	1364	67	0.172	164	12	919	67	0.178	93	42	4.52	0.89	0.16	20	10	328	77	150	89	180	15	691	58	0.26	212	15	854	60	0.248	18	672	55	0.327	2	36	20000	50
216	9.7	37.7	444	71	3.72	0.74	2	605	79	0.02	54	6	653	70	0.083	93	7	770	59	0.121	90	19	5.66	0.69	0.18	40	14	312	508	129	154	161	12	804	58	0.2	168	9	701	36	0.24	8	966	35	0.236	3	40.4	241000	400
227	3.5	38.5	183	92	5.63	0.92	1	824	73	0.008	74	7	507	46	0.146	76	6	618	46	0.123	94	34	5.33	0.87	0.11	21	39	298	167	158	181	95	6	735	49	0.129	124	10	562	46	0.221	9	1244	46	0.188	1	29.9	624000	50
146	5	35.7	162	79	7.31	0.86	3	1164	82	0.041	65	13	369	72	0.176	80	10	604	76	0.132	85	42	4.7	0.8	0.08	28	9	330	217	136	115	117	12	677	68	0.173	96	9	684	65	0.14	11	1113.2	63.97	0.17	3	28	1000000	50
59	4.3	43.4	87	94	5.63	0.9	11	1192	75	0.144	184	11	1303	76	0.141	183	11	1283	74	0.143	106	47	7.04	1.07	0.2	57	36	437	165	95	95	130	8	1162	75	0.112	187	16	705	60	0.265	13	1080	62	0.214	2	31.9	145000	82
167	4.1	42.1	173	60	6.4	0.68	1	532	60	0.017	71	3	1465	71	0.048	68	4	1307	71	0.052	120	26	5.67	0.75	0.17	21	16	378	90	233	394	102	5	1341	68	0.076	113	5	1503	67	0.075	6	1930	67	0.091	0	55.5	100000	50
508	1.6	34.9	144	76	7.85	0.96	8	52	24	0.308	186	16	414	37	0.449	222	18	501	40	0.443	88	46	8.48	1.1	0.15	23	21	288	88	177	144	221	13	841	48	0.263	246	13	843	45	0.292	11	2499	51	0.21	0	56.3	385000	400
200	8.2	43.3	126	87	5.37	0.82	7	1360	41	0.177	300	11	1137	42	0.264	303	12	1052	42	0.288	92	28	4.38	0.76	0.09	45	24	321	86	175	97	274	13	779	36	0.352	290	10	940	33	0.309	15	995	34	0.443	0	24.4	35300	50
184	3.2	37.8	141	83	7.65	1.28	4	1256	70	0.058	254	8	2064	65	0.123	184	8	1378	60	0.134	84	36	5.66	1.04	0.12	12	12	374	78	158	74	199	10	1111	57	0.179	259	13	1144	56	0.226	10	1380	55	0.186	3	42.1	1000000	668
280	3.6	35	224	73	10.25	0.91	7	911	82	0.083	178	18	702	69	0.254	178	18	702	69	0.254	84	21	5.49	0.65	0.1	35	34	319	221	154	219	289	17	907	54	0.319	361	15	1258	53	0.287	19	917	49	0.39	2	38.8	1000000	604
137	1.1	32.5	267	95	5.58	0.86	5	157	44	0.102	107	7	648	43	0.165	103	8	594	45	0.173	88	30	4.39	0.94	0.11	251	131	654	130	138	64	76	8	400	44	0.19	100	11	319	33	0.313	14	400	37	0.38	3	40	571000	254
145	5.5	42.4	142	80	6.7	0.89	1	2673	93	0.007	130	4	2520	81	0.052	114	5	1932	79	0.059	89	28	6.5	0.85	0.09	33	22	353	140	169	343	130	6	1663	71	0.078	229	6	2698	66	0.085	7	1488	66	0.11	2	34.2	1000000	50
190	2.5	33.2	243	76	4.49	0.91	1	388	65	0.008	35	2	1039	70	0.034	44	4	737	63	0.06	95	27	3.95	0.74	0.07	24	12	317	130	173	142	66	5	637	53	0.104	152	7	1010	48	0.15	11	802	46	0.241	1	39.4	514000	50
161	5.6	27.3	406	107	4.11	0.54	1	307	86	0.016	179	15	767	63	0.233	134	10	837	63	0.16	123	39	3.87	0.51	0.1	109	60	443	432	171	466	140	11	778	61	0.18	210	9	1334	59	0.16	8	1168	60	0.14	2	35.2	40500	400
205	3.4	40.2	208	84	5.38	0.92	2	1628	87	0.023	135	5	2335	83	0.058	133	5	2152	85	0.062	90	24	5.84	1.14	0.08	24	31	334	102	192	320	140	6	2097	83	0.067	301	10	2299	75	0.131	10	1820	74	0.134	1	38.3	39500	102
45	7.8	53.8	342	106	9.55	2.27	8	1272	62	0.13	196	12	1086	64	0.18	216	15	790	57	0.273	82	28	5.28	0.74	0.09	26	39	318	138	177	118	152	10	884	61	0.172	229	14	1026	61	0.223	12	1136	65	0.18	0	25.7	87500	72
355	5.4	42	200	85	9.41	1.09	7	2360	81	0.083	1042	22	3265	70	0.319	915	20	3109	69	0.294	81	31	11.36	1.09	0.22	27	32	336	58	117	257	513	15	2334	71	0.22	455	18	1652	65	0.275	16	2384	70	0.23	2	34.6	1000000	3340
135	5.4	47.9	199	99	6.88	0.9	6	446	74	0.085	131	11	756	65	0.173	111	13	503	59	0.221	87	26	6.51	0.97	0.12	29	26	295	127	153	112	167	16	568	55	0.294	197	13	831	57	0.24	13	732	57.56	0.24	0	34.4	48600	66
204	3.3	42.9	131	80	6.24	0.66	6	573	66	0.092	149	12	705	57	0.211	175	11	891	54	0.196	75	27	5.45	1.09	0.27	21	19	255	166	193	253	222	10	1210	56	0.18	210	11	1043	57	0.201	13	1091	54	0.24	1	30.4	1000000	909
247	2.8	33.9	163	86	4.56	1.11	5	667	76	0.064	153	7	1543	75	0.099	135	9	1072	72	0.126	84	27	4.85	1.18	0.2	18	26	250	166	127	528	161	9	1247	71	0.129	328	9	2358	67	0.139	16	1043	56.18	0.28	1	28.2	410000	162
272	2.5	44.5	142	84	9.6	0.77	5	472	69	0.068	151	12	819	64	0.184	166	14	704	60	0.236	93	36	5.39	0.77	0.07	24	32	274	109	149	111	148	11	705	52	0.21	213	15	704	50	0.3	17	897	49.13	0.34	2	29.3	635000	400
103	4.1	46.5	226	94	5.12	1.03	11	741	67	0.167	104	10	608	58	0.171	143	15	502	54	0.285	98	35	4.65	1.15	0.12	46	68	358	147	168	213	228	16	803	57	0.284	295	17	965	56	0.306	19	674	55	0.34	0	49.1	35500	50
114	3.5	39.8	215	88	6.82	0.69	5	1383	74	0.068	129	6	1287	61	0.1	151	7	1252	61	0.121	95	28	5.74	0.8	0.12	51	82	335	243	185	153	174	7	1436	58	0.12	223	10	1130	50	0.2	12	901.6	50	0.23	2	38.7	751000	50
377	2.9	41.7	255	82	8.24	0.91	2	461	34	0.054	135	5	769	29	0.176	31	2	336	17	0.092	77	32	6.69	0.99	0.06	20	28	401	92	251	563	233	7	1107	34	0.21	292	10	1139	38	0.26	11	1577	42	0.45	0	33.6	398000	132
-34	2.7	42.3	176	85	5.13	0.8	9	1325	69	0.125	180	12	718	49	0.251	305	9	1671	51	0.183	94	22	3.71	0.9	0.05	17	21	225	145	211	714	227	12	1065	58	0.213	286	11	1209	47	0.24	9	808	57	0.16	0	41.4	1570	184
173	4.4	48.6	251	81	7.13	0.76	3	1032	65	0.053	59	4	1013	63	0.058	74	5	892	55	0.083	82	4	4.44	0.7	0.53	17	21	371	110	174	103	88	5	970	55	0.09	151	11	755	54	0.2	7	1376	52	0.17	1	30.4	304000	50
177	3.8	38.3	259	91	5.04	0.79	7	867	69	0.096	184	9	1013	49	0.182	170	8	1068	49	0.159	86	30	4.52	0.87	0.15	28	34	345	109	191	203	223	9	975	41	0.23	262	12	925	43	0.28	13	690	34	0.38	2	28.3	415000	148
104	3.4	40.3	305	106	5.5	0.78	13	89	35	0.371	57	13	120	28	0.475	64	12	138	25	0.464	80	37	4.45	0.97	0.12	25	32	309	220	192	185	74	11	166	25	0.446	79	8	253	26	0.31	11	408	31	0.34	1	47	744000	50
94	3	40.2	9	86	6.62	0.75	8	265	49	0.158	185	14	540	40	0.343	97	12	270	33	0.36	80	17	5.35	0.65	0.04	30	30	349	163	149	129	137	13	335	32	0.409	125	11	340	31	0.37	10	438	34	0.31	2	51.9	263000	343
228	4.2	34.8	380	101	5.63	0.75	5	1551	79	0.062	298	8	2657	75	0.11	126	7	1334	76	0.094	94	34	4.13	0.79	0.43	35	30	240	176	134	172	268	13	1414	68	0.19	321	13	1616	66	0.2	14	1490	63	0.22	1	35.7	526000	50
300	3.1	41.2	211	91	7.23	0.84	2	361	68	0.025	74	7	724	69	0.102	47	5	616	64	0.076	88	23	6	0.96	0.14	21	39	267	90	116	146	145	11	607	45	0.239	250	19	574	44	0.44	21	617	43	0.5	0	23.6	1000000	5360
226	4.5	49.8	224	79	7.68	0.89	5	1084	55	0.083	164	6	1733	63	0.09	171	6	1505	55	0.114	81	33	7.14	0.85	0.17	83	116	350	106	149	67	197	9	1060	51	0.186	347	14	1201	47	0.29	18	782	44	0.4	3	35	1000000	84
155	3.3	47.2	242	72	5.31	0.78	15	1053	58	0.261	363	20	859	48	0.423	297	19	731	48	0.406	76	29	5.83	0.71	0.14	12	12	195	122	157	193	428	22	826	43	0.518	430	21	902	46	0.48	22	837	44	0.51	0	25.7	135000	53
100	5.7	49.2	256	87	6.44	0.68	10	916	64	0.155	251	17	809	54	0.31	288	16	938	53	0.31	89	39	6.69	0.74	0.13	24	27	240	133	209	220	317	17	950	51	0.33	319	18	965	53	0.33	17	763	55	0.32	0	41.4	184000	669
63	3.3	42.3	178	86	7.15	1.03	7	1242	72	0.102	162	12	869	62	0.19	160	10	993	62	0.16	88	35	6.61	0.89	0.15	36	35	336	117	142	303	162	12	869	62	0.19	194	15	641	50	0.03	17	520	47.38	0.36	1	28.4	203000	50
2	6.2	46.3	321	76	5.58	0.83	7	1305	73	0.101	152	7	1580	75	0.1	194	8	1755	73	0.111	77	20	5.41	0.76	0.36	47	67	275	203	146	177	161	7	1663	69	0.1	149	8	1254	65	0.12	9	965	61	0.14	1	27.9	84400	50
174	2.6	42.3	341	79	3.13	0.84	5	1199	86	0.06	191	15	811	64	0.24	171	13	793	63	0.216	88	25	3.05	0.74	0.08	30	33	270	109	198	116	205	14	858	59	0.24	215	10	1447	64	0.15	12	1126	57	0.22	2	30.6	100006	430
246	2.1	33	238	77	4.04	0.67	7	299	63	0.117	160	22	314	43	0.51	153	10	685	43	0.223	81	31	3.94	0.8	0.08	28	36	287	119	176	171	274	14	873	45	0.31	304	12	1586	65	0.19	15	604	32	0.47	1	29.8	100005	112
235	2.9	30.1	183	76	8.11	0.88	4	539	68	0.058	245	10	1581	62	0.155	217	10	1430	64	0.15	81	32	4.44	0.85	0.09	23	19	312	105	149	121	326	11	1948	66	0.17	250	10	1665	64	0.15	12	1306	59	0.2	1	33.4	100005	478
145.3	2.3	36.2	288	76	5.41	0.86	1.5	873	77.2	0.02	63	3	1459	73	0.043	74	4	1387	71	0.053	89	31	5.11	0.87	0.38	26	18	288	126	139	287	86	4	1562	69	0.06	106	5	1332	63	0.08	7	1427	66	0.11	0	31.9	295000	50
144	4.3	46.8	183	94	6.16	0.89	6	1630	74	0.08	158	7	1596	72	0.099	149	9	1077	65	0.138	90	34	6.35	0.85	0.09	38	46	287	160	132	312	188	9	1385	67	0.14	188	12	952	60	0.2	18	890	61	0.3	2	31.7	108000	400
245	4	45.6	153	96	5.28	0.9	4	1874	78	0.06	261	13	1231	61	0.212	259	15	1053	62	0.25	99	33	4.42	0.89	0.08	31	30	295	167	141	340	235	16	845	58	0.28	376	18	1133	55	0.33	26	658	49	0.53	1	36.7	559000	801
344.6	5.2	47.1	121	83	4.43	0.77	13.6	870	53.1	0.26	349	20	822	48	0.42	335	22	673	43	0.5	89	30	4.22	0.77	0.16	31	24	286	129	148	146	419	23	803	44	0.52	433	23	829	43	0.52	31	636	34	0.89	1	25.6	33790	667
345	2.5	43	356	94	3.82	0.76	6	527	56	0.11	323	18	827	46	0.39	310	15	821	39	0.38	88	30	3.77	0.82	0.09	26	30	245	198	168	179	330	17	851	43	0.39	330	14	982	43	0.34	20	868	42	0.46	2	35.1	984000	1940
287	3.4	45.4	218	89	4.33	0.72	3	901	62	0.05	134	8	914	55	0.15	131	7	1097	60	0.12	91	23	3.76	0.88	0.09	39	36	346	116	202	247	200	9	1285	57	0.16	330	11	1672	56	0.2	13	1446	58	0.23	2	33.7	497000	400
196	9.6	43.3	195	96	5.43	0.73	3	1165	55	0.06	126	8	786	50	0.16	89	7	648	53	0.14	103	23	3.62	0.68	0.18	23	25	334	281	215	195	158	10	943	60	0.17	215	10	1111	53	0.19	11	1249	51.41	0.21	1	54.4	791557	157
205	3.7	42.6	228	80	7.45	0.87	12	948	57	0.21	285	15	1024	53	0.28	397	17	1228	51	0.32	94	42	6.16	0.87	0.09	25	26	304	180	162	106	295	18	800	48	0.37	504	25	897	44	0.56	22	741	42	0.54	1	39.1	388871	189
377.9	3.2	36	197	83	6.14	0.98	7.1	748	63.7	0.11	229	14	973	61	0.24	414	13	1912	60	0.22	82	27	5.7	1	0.09	24	15	258	124	151	113	274	20	697	50	0.39	359	26	625	46	0.57	26	850	48.64	0.54	0	34.1	48137	201
309	2.3	43.8	159	92	6.95	0.75	10.5	129	39.8	0.26	200	16	547	44	0.36	230	15	573	38	0.4	107	28	5.94	0.91	0.12	25	29	294	116	149	343	274	19	399	28	0.69	311	24	338	26	0.92	18	598	32	0.57	2	50.6	278000	50
123.7	2.9	40.9	265	75	7.52	0.69	3.1	1666	71.1	0.04	122	6	1491	73	0.08	96	7	1029	73	0.09	88	16	5.59	0.78	0.08	23	25	338	198	191	182	154	8	1262	62	0.12	138	8	1009	61	0.14	11	1097	61	0.18	1	35.7	714000	52
297.1	3.6	40.4	227	99	4.02	0.94	5.3	185	65.4	0.08	161	10	1007	60	0.16	162	10	956	59	0.17	84	46	4.06	0.92	0.05	22	24	369	110	134	167	156	13	610	52	0.26	253	20	572	46	0.44	16	880	46	0.35	0	30	377000	138
241	4.1	42.8	170	86	5.84	0.43	1.7	711	58	0.03	89	5	1276	65	0.07	104	6	1097	64	0.1	96	26	4.96	0.76	0.11	20	25	280	115	119	175	204	10	1209	59	0.17	258	15	915	54	0.28	15	867	51	0.3	3	29.2	161000	50
296.5	5.2	35.4	302	78	7.64	1.06	2.6	1200	76.6	0.03	365	13	1637	57	0.22	212	10	1265	60	0.01	81	23	7.1	1.02	0.15	35	40	419	138	201	1087	258	13	1124	55	0.23	238	11	1145	54	0.21	13	1553	58	0.22	0	42.2	313000	177
227	6.6	38.6	167	77	7.43	0.91	2.6	2334	83	0.03	264	16	1106	65	0.24	121	8	1041	67	0.12	81	30	5.84	0.93	0.12	29	27	247	122	159	100	315	15	1118	54	0.28	269	16	778	45	0.35	15	744	38	0.4	1	42.6	91200	400
221	4.3	40.6	144	92	7.28	0.69	9	2134	75	0.13	583	14	2814	66	0.21	748	15	3300	65	0.23	104	23	5.29	0.76	0.13	37	41	351	130	200	222	459	16	1697	60	0.27	458	17	1611	60	0.28	15	1788	56	0.27	1	50.5	1000000	113
[truncated: 3 more columns]
